# Supplementary material for: Epidemiological consequences of immune sensitisation by pre-exposure to vector saliva
Source: PubMed Central journal article supplement (PMC5648264; doi:10.1371/journal.pntd.0005956), 2017-10-09
Supplement: pntd.0005956.s001.pdf [file pntd.0005956.s001.pdf]

## S1 Appendix: Disease-free equilibrium and calculating $R_0$

In the ODE model, when a vector population is free of parasites, the change in the number of vectors,  $V_S$ , is described simply by:

$$\frac{dV_S(t)}{dt} = \phi_V - \mu_V V_S(t) \quad (\text{S1})$$

where  $\phi_V$  and  $\mu_V$  are the rates of vector birth and death respectively. By setting  $\frac{dV_S(t)}{dt}$  equal to zero, we obtain the disease-free vector equilibrium, i.e.  $\widehat{V}_S = \frac{\phi_V}{\mu_V}$ .

Similarly, in the absence of parasites, the change in the number of naïve susceptible,  $H_S$ , susceptible hosts is described as

$$\frac{dH_S(t)}{dt} = -rP_{HV}V_S(t)H_S(t) + \theta_{H'}(H_T - H_S(t)) \quad (\text{S2})$$

where  $r$  is the rate at which a host gets bitten by a vector (defined as  $\frac{b}{H_T}$  where  $b$  is the biting rate per vector and  $H_T$  is the constant total host population size),  $P_{HV}$  is the probability of pre-sensitisation per biting event, and  $\theta_{H'}$  is the rate of loss of the saliva pre-exposure effect. Note that  $H_T - H_S(t)$  is the number of susceptible hosts that are pre-exposed to vector saliva. By setting  $\frac{dH_S(t)}{dt}$  equal to zero, we obtain the disease-free susceptible host equilibrium,

$$\widehat{H}_S = \frac{\theta_{H'}H_T^2}{bP_{HV}\widehat{V}_S + \theta_{H'}H_T}, \quad (\text{S3})$$

and the equilibrium number of pre-sensitised susceptible hosts,  $\widehat{H}'_S$ , is simply  $H_T - \widehat{H}_S$ .

The risk of an epidemic outbreak is conventionally expressed as the basic reproductive number,  $R_0$ , which is the number of secondary infections produced when one infected individual is introduced to an entirely susceptible population of hosts. Here we calculate  $R_0$  using the next generation method [1], which is a general approach to calculate  $R_0$  for infection cycles involving multiple infected compartments as the dominant eigenvalue of the next generation matrix (refer to Heffernan et al. [2] for an accessible overview of this approach). Following the notation of Heffernan et al. [2], the infection matrix,  $F$  and the transition matrix,  $V$  for our ODE model (eq. 1 main text) are described as follows:

$$F = \begin{pmatrix} 0 & 0 & rT_{VH}V_S & rT_{VH'}V_S \\ 0 & 0 & 0 & 0 \\ 0 & rT_{HV}H_S & 0 & 0 \\ 0 & rT_{H'V}H'_S & 0 & 0 \end{pmatrix}, \quad (\text{S4})$$

$$V = \begin{Bmatrix} \mu_V + \sigma_V & 0 & 0 & 0 \\ -\sigma_V & \mu_V & 0 & 0 \\ 0 & 0 & \gamma_H & 0 \\ 0 & 0 & 0 & \gamma_{H'} \end{Bmatrix}. \quad (\text{S5})$$

The next generation matrix is then calculated as the product of the infection matrix and the inverse of the transition matrix,  $FV^{-1}$  as follows:

$$FV^{-1} = \begin{Bmatrix} 0 & 0 & \frac{rT_{VH}V_S}{\gamma_H} & \frac{rT_{VH'}V_S}{\gamma_{H'}} \\ 0 & 0 & 0 & 0 \\ \frac{\sigma_V r T_{HV} H_S}{\mu_V^2 + \mu_V \sigma_V} & \frac{r T_{HV} H_S}{\mu_V} & 0 & 0 \\ \frac{\sigma_V r T_{H'V} H'_S}{\mu_V^2 + \mu_V \sigma_V} & \frac{r T_{H'V} H'_S}{\mu_V} & 0 & 0 \end{Bmatrix}. \quad (\text{S6})$$

Then the dominant eigenvalue of the matrix  $FV^{-1}$  gives  $R_0$ :

$$R_0 = \frac{r\sqrt{V_S}\sqrt{\sigma_V}\sqrt{H_S T_{HV} T_{VH} \gamma_{H'} + H'_S T_{H'V} T_{VH'} \gamma_H}}{\sqrt{\gamma_H}\sqrt{\gamma_{H'}}\sqrt{\mu_V(\mu_V + \sigma_V)}}. \quad (\text{S7})$$

The effect of saliva-induced pre-sensitisation on the chance of a disease outbreak can be assessed by taking the partial derivative of  $R_0$  with respect to the probability of successful pre-sensitisation upon contact, i.e.,  $P_{HV}$ . While the full expression of  $\frac{\partial R_0}{\partial P_{HV}}$  is rather large and not shown here, we find the following proportional relationship:

$$\frac{\partial R_0}{\partial P_{HV}} \propto T_{H'V} T_{VH'} \gamma_H - T_{HV} T_{VH} \gamma_{H'}. \quad (\text{S8})$$

The sign of this expression determines the directional influence of saliva pre-sensitisation probability on  $R_0$ : when positive, pre-sensitisation increases the chance of an outbreak and when negative it decreases the same chance. This term can be rearranged to give a condition for when pre-sensitisation increases  $R_0$ :

$$\frac{T_{H'V} T_{VH'}}{T_{HV} T_{VH}} > \frac{\gamma_{H'}}{\gamma_H}. \quad (\text{S9})$$

This expression simply tells us that pre-sensitisation facilitates disease outbreaks if the ratio of the product of the transmission probabilities (i.e., vector to host and host to vector transmission) of pre-sensitised hosts to naïve hosts is greater than the relative recovery rate of pre-sensitised hosts to

naïve hosts. Such a scenario is foreseeable if pre-exposure to saliva leads to milder infections that are rarely treated, and susceptibility and infectivity of pre-sensitised hosts remain sufficiently high.

## References

- [1] Diekmann O, Heesterbeek JAP, Metz JA. On the definition and the computation of the basic reproduction ratio  $R_0$  in models for infectious diseases in heterogeneous populations. *J Math Biol.* 1990;28(4):365–382.
- [2] Heffernan J, Smith R, Wahl L. Perspectives on the basic reproductive ratio. *J R Soc Interface.* 2005;2(4):281–293.
