# Supplementary material for: Epidemiological consequences of immune sensitisation by pre-exposure to vector saliva
Source: PubMed Central journal article supplement (PMC5648264; doi:10.1371/journal.pntd.0005956), 2017-10-09
Supplement: pntd.0005956.s003.pdf [file pntd.0005956.s003.pdf]

### S3 Appendix: Parameter sensitivity

We explored the parameter sensitivity of the result that pre-sensitised infections can increase in response to vector control targeting vector survival using the ODE model (Fig. A2). The change in the number of pre-sensitised infections due to control is driven by the change in 1) the availability of pre-sensitised susceptible hosts, and 2) the force of infection. Therefore, the increase in the number of pre-sensitised infections is most pronounced in parameter spaces where the change in the availability of pre-sensitised susceptible hosts due to control is large (e.g., low rate of loss of saliva pre-exposure effect,  $\theta_{H'}$ ) and the force of infection is high (e.g., high vector biting rate,  $b$ ).

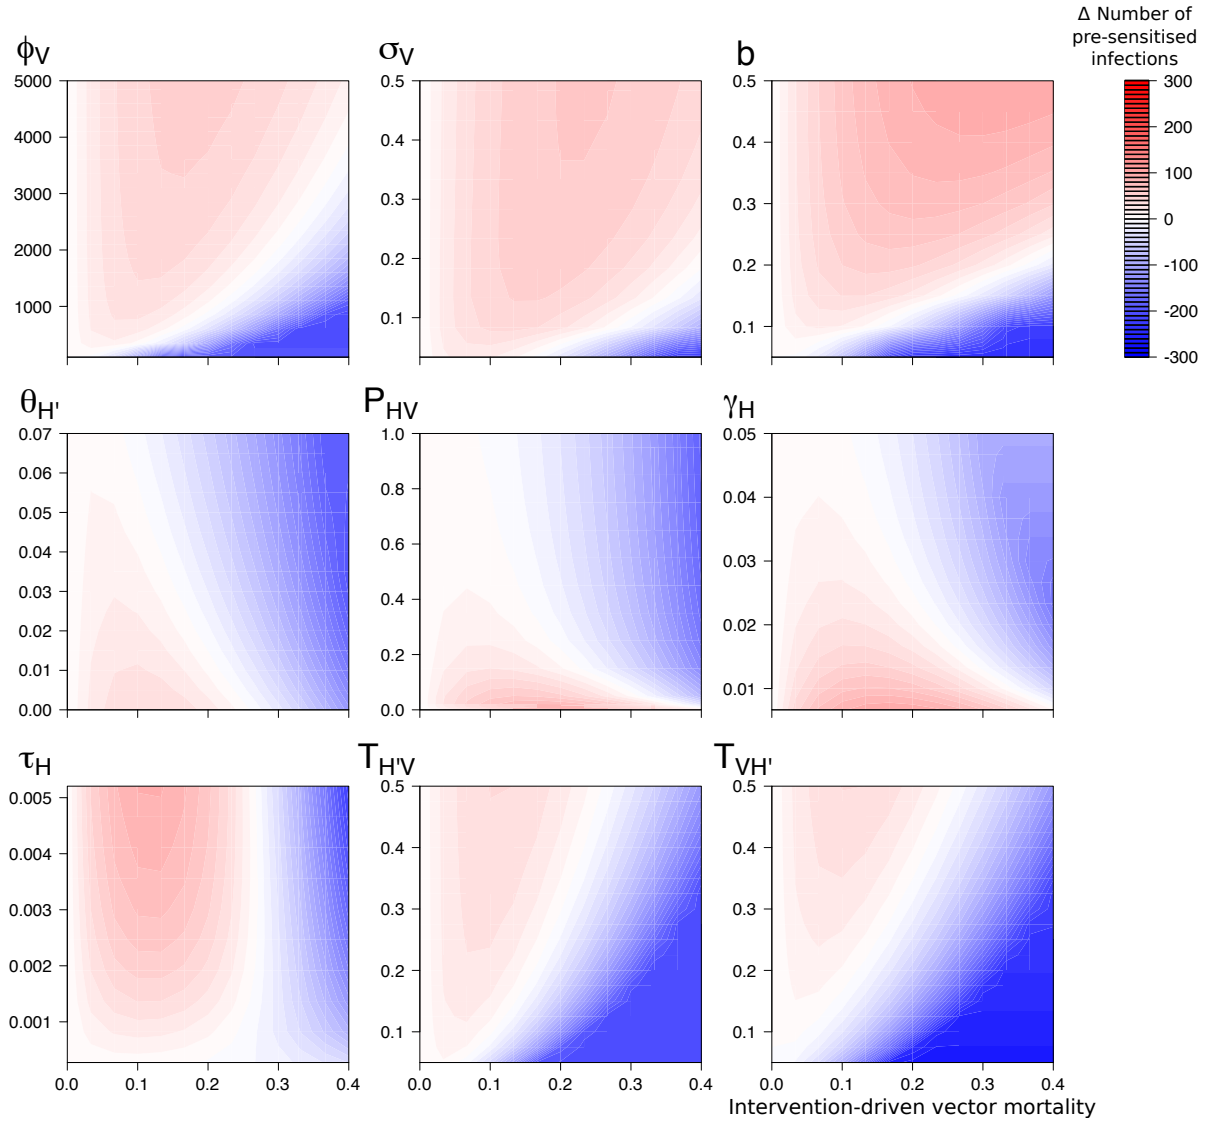

Figure A2: Parameter sensitivity. Contour plots show the change of the number of pre-sensitised infections as a function of the rate of intervention-driven vector mortality ( $\mu_V$ ; x-axis) and a parameter of interest labelled on each y-axis. Parameters explored in the ODE model are vector birth rate ( $\phi_V$ ), parasite incubation rate in the vector ( $\sigma_V$ ), vector biting rate ( $b$ ), rate of loss of saliva pre-exposure effect ( $\theta_{H'}$ ), pre-sensitisation probability upon contact ( $P_{HV}$ ), recovery rate of naïve hosts ( $\gamma_H$ ), rate of loss of acquired immunity ( $\tau_H$ ), transmission probability from naïve host to vector ( $T_{VH}$ ) and transmission probability from pre-sensitised host to vector ( $T_{VH'}$ ). Areas in red show increasing number of pre-sensitised infections in response to vector control, while areas in blue decreasing pre-sensitised infections. (The y-axes delineates the baseline conditions of no vector control and only natural vector mortality). The parameter ranges explored are given in Table 1 in the main text. Parameters that are not explicitly varied in each panel are set as defaults in Table 1.
